# Supplementary material for: Influence of Lactobacillus paracasei HII01 Supplementation on Glycemia and Inflammatory Biomarkers in Type 2 Diabetes: A Randomized Clinical Trial
Source: MDPI journal article supplement (doi:10.3390/foods10071455), 2021-06-23
Supplement: s1 [file s1]

**Table S1** Baseline biochemical parameters at the beginning of the study.

| Variable                | Placebo (n=18)  | Probiotic (n=18) | P value            |
|-------------------------|-----------------|------------------|--------------------|
| BMI                     | 23.05 ± 2.60    | 23.22 ± 2.72     | 0.852 <sup>a</sup> |
| BUN (mg/dL)             | 19.45 ± 9.24    | 8.87 ± 9.04      | 0.850 <sup>a</sup> |
| Creatinine (mg/dL)      | 1.46 ± 0.57     | 1.60 ± 0.70      | 0.539 <sup>a</sup> |
| AST (IU/L)              | 21.94 ± 8.10    | 27.50 ± 36.96    | 0.392 <sup>b</sup> |
| ALT (IU/L)              | 22.33 ± 12.39   | 19.89 ± 16.58    | 0.168 <sup>b</sup> |
| ALP (IU/L)              | 100.39 ± 20.86  | 98.61 ± 28.99    | 0.834 <sup>a</sup> |
| FBG (mg/dL)             | 139.29 ± 49.77  | 129.18 ± 34.52   | 0.496 <sup>a</sup> |
| HbA1c (mg%)             | 6.64 ± 1.44     | 7.05 ± 1.85      | 0.468 <sup>a</sup> |
| Cholesterol (mg/dL)     | 190.83 ± 43.22  | 188.59 ± 34.21   | 0.866 <sup>a</sup> |
| Triglyceride (mg/dL)    | 147.78 ± 71.32  | 153.27 ± 55.46   | 0.810 <sup>a</sup> |
| HDL (mg/dL)             | 62.87 ± 9.83    | 62.06 ± 14.84    | 0.859 <sup>a</sup> |
| LDL (md/dL)             | 102.11 ± 32.60  | 109.24 ± 38.44   | 0.558 <sup>a</sup> |
| Leptin (ng/mL)          | 15.56 ± 13.56   | 15.74 ± 9.51     | 0.831 <sup>b</sup> |
| Adiponectin (ng/mL)     | 27.70 ± 7.26    | 23.40 ± 8.75     | 0.441 <sup>a</sup> |
| IgA (ng/mL)             | 660.68 ± 262.60 | 526.24 ± 249.61  | 0.150 <sup>a</sup> |
| LPS (pg/mL)             | 72.38 ± 40.67   | 92.05 ± 35.95    | 0.094 <sup>b</sup> |
| ZO-1 (ng/mL)            | 1.80 ± 0.86     | 1.61 ± 0.53      | 0.451 <sup>a</sup> |
| hsCRP (ml/L)            | 0.016 ± 0.007   | 0.014 ± 0.002    | 0.385 <sup>a</sup> |
| Lactic acid (μmol/g)    | 22.60 ± 19.57   | 20.46 ± 16.08    | 0.831 <sup>b</sup> |
| Acetic acid (μmol/g)    | 359.40 ± 75.80  | 343.84 ± 46.56   | 0.695 <sup>a</sup> |
| Propionic acid (μmol/g) | 42.83 ± 17.91   | 49.86 ± 94.36    | 0.103 <sup>b</sup> |
| Butyric acid (μmol/g)   | 51.46 ± 13.68   | 48.71 ± 29.76    | 1.000 <sup>b</sup> |
| IL-6 (ng/mL)            | 11.73 ± 1.66    | 10.07 ± 3.05     | 0.169 <sup>a</sup> |
| IL-10 (ng/mL)           | 1.27 ± 0.15     | 1.12 ± 0.05      | 0.232 <sup>a</sup> |
| IL-1β (ng/mL)           | 7.26 ± 2.49     | 8.21 ± 3.52      | 0.650 <sup>a</sup> |
| TNF-α (ng/mL)           | 11.75 ± 3.01    | 11.91 ± 0.72     | 0.932 <sup>a</sup> |

Data are mean ± SD. <sup>a</sup> p-value obtained from independent t-test, <sup>b</sup> p-value obtained from Wilcoxon rank sum test.

**Table S2** Oral anti-diabetic drugs used of participants.

| Anti-diabetic drugs          | Placebo group | Probiotic group |
|------------------------------|---------------|-----------------|
| metformin                    | 18            | 18              |
| sulfonylurea                 | 10            | 8               |
| alpha-glucosidase inhibitors | 4             | 2               |

n=18/group

All participants in both groups received metformin (100%)

Some participants received metformin combine with sulfonylurea or alpha-glucosidase inhibitor.

**Placebo group;** metformin combines with sulfonylurea = 55.5%

metformin combines with alpha-glucosidase inhibitor = 22.2%

**Probiotic group;** metformin combines with sulfonylurea = 44.4%

metformin combines with alpha-glucosidase inhibitor = 11.1%
